# Supplementary material for: Mutations in the Motile Cilia Gene DNAAF1 Are Associated with Neural Tube Defects in Humans
Source: G3 (Bethesda). 2016 Aug 18;6(10):3307–16. doi: 10.1534/g3.116.033696 (PMC5068950; doi:10.1534/g3.116.033696)
Supplement: Supplemental Material [file supp_g3.116.033696_TableS1.pdf]

**Table S1. A summary for the candidate genes sequenced in the current study**

| <b>Pathway</b>                                             | <b>Gene</b>                                                        |
|------------------------------------------------------------|--------------------------------------------------------------------|
| Planar cell polarity signaling                             | 20 genes, including CELSR1, DVL1, FUZ etc.                         |
| Cytoskeleton                                               | 21 genes, including ABI1, SHROOM3, VCL etc.                        |
| Canonical Wnt signaling and Wnt-Ca <sup>2+</sup> signaling | 11 genes, including FZD4, LRP6, CTNNB1 etc.                        |
| Homeobox related                                           | 10 genes, including HOXA1, PAX3, SIX3 etc.                         |
| Cilia                                                      | 7 genes, including BBS4, CEP290, DNAAF1, IFT172, INTU, MKS1, IQCB1 |
| Cell cycle                                                 | 3 genes, including OFD1, STIL, GMNN                                |
| Neural development                                         | 16 genes, including ALX1, ZIC2, TRPM6 etc.                         |
| TGF-beta signaling                                         | 8 genes, including BMP4, NOG, ZEB2 etc.                            |
| One carbon metabolism                                      | 32 genes, including FOLR1, MTHFD1, MTRR etc.                       |
| Notch signaling                                            | 9 genes, including TWIST1, MIB2, NUMB etc.                         |
| Hedgehog signaling                                         | 8 genes, including PTCH1, RAB23, SHH etc.                          |
| Apoptosis                                                  | 14 genes, including APAF1, CASP3, BCL10 etc.                       |
| MAPK signaling                                             | 14 genes, including MAPK9, NF1, PRKACA etc.                        |
| DNA repair and damage                                      | 12 genes, including BRCA1, HIPK1, TERC etc.                        |
| Chromatin modifier                                         | 24 genes, including DNMT3B, EP300, CITED2 etc.                     |
| ECM and cell adhesion                                      | 17 genes, including ITGA6, FREM2, EPHA7 etc.                       |
| Glucose metabolism                                         | 15 genes, including POMT1, FOXO1, TSC1 etc.                        |
| Retinoid metabolism                                        | 6 genes, including ALDH1A2, CYP26A1, RARA etc.                     |
| Inositol metabolism                                        | 4 genes, including INPP5E, TULP3, PIP5K1C etc.                     |
| Protein processing                                         | 8 genes, including NUP50, HECTD1, TCOF1 etc.                       |
| Others                                                     | 22 genes, including SP8, LUZP1, CSK etc.                           |
